- maxillary gland *in vivo* during sympathetic nerve stimulation, *Life Sci.* 6: 45, 1967.
20. Sedvall, G. C., Weise, V. K., and Kopin, I. J.: The rate of norepinephrine synthesis measured *in vivo* during short intervals; influence of adrenergic nerve impulse activity, *J. Pharmacol. Exp. Ther.* 159: 274, 1968.
  21. Oliverio, A., and Stjärne, L.: Acceleration of noradrenaline turnover in the mouse heart by cold exposure, *Life Sci.* 4: 2339, 1964.
  22. Gordon, R., Spector, S., Sjoerdsma, A., and Udenfriend, S.: Increased synthesis of norepinephrine and epinephrine in the intact rat during exercise and exposure to cold, *J. Pharmacol. Exp. Ther.* 153: 440, 1966.
  23. Nahas, G. G., and Steinsland, O. S.: Increased rate of catecholamine synthesis during respiratory acidosis, *Resp. Physiol.* 5: 108, 1968.
  24. Gardier, R. W., Endahl, G. L., and Hamelberg, W.: Cyclopropane: Effect on catecholamine biotransformation, *ANESTHESIOLOGY* 28: 677, 1967.
  25. Price, M. L., and Price, H. L.: Effect of general anesthetics on contractile response of rabbit aortic strips, *ANESTHESIOLOGY* 23: 16, 1962.
  26. Cravenstein, J. S., Sherman, E. T., and Anderson, T. W.: Cyclopropane-epinephrine interaction on the nictitating membrane of the spinal cat, *J. Pharmacol. Exp. Ther.* 129: 428, 1960.
  27. Davis, L. D., Temte, J. V., and Murphy, Q. R., Jr.: Epinephrine-cyclopropane effects on Purkinje fibers, *ANESTHESIOLOGY* 30: 368, 1969.
  28. Ngai, S. H., Hanks, E. C., and Farhie, S. E.: Effects of anesthetics on neuromuscular transmission and somatic reflexes, *ANESTHESIOLOGY* 26: 162, 1965.

## Muscle

**METHOXYFLURANE** Muscular relaxation caused by methoxyflurane was tested by its effect on electromyographic reflexes. The tibial nerve, which carries afferent and efferent fibers, was stimulated. This produces a quick and direct muscular response via the neuromuscular synapse (potential A) and a reflex via the spinal cord (potential B). During general anesthesia with methoxyflurane, potential A was not influenced while potential B was decreased and finally disappeared. (Droh, R., Solberg, G., and Gottaid, A.: *Electrophysiological Investigations of the Muscle-relaxing Effects of Methoxyflurane*, *Der Anaesthetist* 17: 51 (Feb.) 1968.)

**MUSCLE PAIN** Postoperative muscle pain occurred in 104 of 500 patients following the use of succinylcholine. Pain occurred more frequently in women than in men. The highest incidence occurred in patients between 14 and 40 years of age. There is no direct relation between the amount of succinylcholine used and the incidence of pain. Neostigmine, 0.5 mg three times a day, caused a significant decrease in muscle pain. No explanation is available for this effect. (Brochert, K.: *The Problem of Muscle Pain after Succinylcholine*, *Der Anaesthetist* 17: 189 (June) 1968.)
